# Supplementary material for: Health Risk Assessment in Children Occupationally and Para-Occupationally Exposed to Benzene Using a Reverse-Translation PBPK Model
Source: Int J Environ Res Public Health. 2023 Jan 27;20(3):2275. doi: 10.3390/ijerph20032275 (PMC9915979; doi:10.3390/ijerph20032275)
Supplement: Supplementary file 1 [file ijerph-20-02275-s001.zip › ijerph-2125369-supplementary.pdf]

**Table S1.** Parameters used to estimate the exposure to benzene in three scenarios created for shoemaker family children of Ticul, Yucatan, Mexico.

| Scenario                                                  | Parameter      | Value |
|-----------------------------------------------------------|----------------|-------|
| a) Children 6 to 12<br>years old exposed 4<br>hours/day   | EF (days/year) | 300   |
|                                                           | ED (years)     | 6     |
|                                                           | AT (days)*     | 2190  |
|                                                           | ET (min/day)   | 240   |
| b) Children 6 to 12<br>years old exposed 8<br>hours/day   | EF (days/year) | 300   |
|                                                           | ED (years)     | 6     |
|                                                           | AT (days)*     | 2190  |
|                                                           | ET (min/day)   | 480   |
| c) Projection for<br>exposure during 70<br>years of life. | EF (days/year) | 300   |
|                                                           | ED (years)     | 70    |
|                                                           | AT (days)*     | 25550 |
|                                                           | ET (min/day)   | 480   |

EF = exposure frequency, ED = exposure duration, AT = average exposure time, ET = exposure time

\* Calculated by multiplying ED x 365 days.
